# Supplementary material for: Saxagliptin Cardiotoxicity in Chronic Heart Failure: The Role of DPP4 in the Regulation of Neuropeptide Tone
Source: MDPI journal article supplement (doi:10.3390/biomedicines10071573), 2022-07-01
Supplement: s1 [file s1]

# Supplementary Material

## Saxagliptin cardiotoxicity in chronic heart failure: the role of DPP4 in the regulation of neuropeptide tone

Imre Vörös<sup>1,2,3</sup>, Zsófia Onódi<sup>1,2,3</sup>, Viktória Éva Tóth<sup>1,2,3</sup>, Tamás G. Gergely<sup>1,2,3</sup>, Éva Sággy<sup>1</sup>, Anikó Görbe<sup>1,4</sup>, Ágnes Kemény<sup>5,6,7</sup>, Przemysław Leszek<sup>8</sup>, Zsuzsanna Helyes<sup>5,6,9</sup>, Péter Ferdinandy<sup>1,4</sup>, Zoltán V. Varga<sup>1,2,3\*</sup>

<sup>1</sup>Cardiometabolic Research Group and MTA-SE System Pharmacology Research Group, Department of Pharmacology and Pharmacotherapy, Semmelweis University, 1085 Budapest, Hungary; voros.imre@med.semmelweis-univ.hu (I.V.); onodi.zsolia@med.semmelweis-univ.hu (Z.O.); toth.viktoria@med.semmelweis-univ.hu (V.É.T.); gergely.tamas@med.semmelweis-univ.hu (T.G.G.); saggy.eva@med.semmelweis-univ.hu (É.S.); gorbe.aniko@med.semmelweis-univ.hu (A.G.); peter.ferdinandy@pharmahungary.com (P.F.); varga.zoltan@med.semmelweis-univ.hu (Z.V.V.);

<sup>2</sup>HCEMM-SU Cardiometabolic Immunology Research Group, Semmelweis University, 1085 Budapest, Hungary;

<sup>3</sup>MTA-SE Momentum Cardio-Oncology and Cardioimmunology Research Group, Semmelweis University, 1085 Budapest, Hungary;

<sup>4</sup>Pharmahungary Group, 6722 Szeged, Hungary;

<sup>5</sup>Szentágotthai János Research Centre, University of Pécs, 7624 Pécs, Hungary; kemeny.agnes@pte.hu (Á.K.); zsuzsanna.helyes@aok.pte.hu (Z.H.);

<sup>6</sup>Department of Pharmacology and Pharmacotherapy, Medical School, University of Pécs, 7624 Pécs, Hungary;

<sup>7</sup>Department of Medical Biology, University of Pécs, 7624 Pécs, Hungary;

<sup>8</sup>Department of Heart Failure and Transplantology, Cardinal Stefan Wyszyński National Institute of Cardiology, 04-628 Warszawa, Poland; przemyslaw.leszek@ikard.pl (P.L.);

<sup>9</sup>PharmInVivo Ltd. 7629 Pécs, Hungary

\* Correspondence: varga.zoltan@med.semmelweis-univ.hu; Tel.: +36-1-2104416

## SUPPLEMENTARY TABLES

**Supplementary Table S1 – Patient characteristics in Western blot experiments**

| <b>Parameter</b>                             | <b>CON</b> | <b>ICM</b>      | <b>DCM</b>        |
|----------------------------------------------|------------|-----------------|-------------------|
| <b>Gender</b> (male/female)                  | 6/2        | 8/1             | 8/0               |
| <b>Age</b> (year)                            | 33 (23-52) | 58 (39-66)      | 48 (27-58)        |
| <b>BMI</b> (kg/m <sup>2</sup> )              | 25 (20-32) | 27 (20-33)      | 29 (21-40)        |
| <b>Ejection fraction</b> (%)                 | -          | 21 (13-33)      | 19 (5-33)         |
| <b>N-terminal pro-BNP</b> (pg/ml)            | -          | 3328 (338-8024) | 5308 (1001-14750) |
| <b>Medications</b>                           |            |                 |                   |
| <b>Norepinephrine</b>                        | 7          | 0               | 1                 |
| <b>ACE inhibitors</b>                        | 0          | 7               | 6                 |
| <b>Beta receptor blockers</b>                | 1          | 9               | 8                 |
| <b>Mineralocorticoid receptor inhibitors</b> | 0          | 9               | 2                 |
| <b>Furosemide</b>                            | 1          | 0               | 0                 |
| <b>Mannitol</b>                              | 1          | 0               | 0                 |
| <b>Digoxin</b>                               | 0          | 1               | 1                 |
| <b>Mexiletine</b>                            | 0          | 1               | 1                 |
| <b>Amiodarone</b>                            | 0          | 3               | 5                 |
| <b>Anticoagulants</b>                        | 1          | 5               | 4                 |
| <b>Antiplatelets</b>                         | 0          | 7               | 0                 |
| <b>Dopamine</b>                              | 0          | 3               | 3                 |
| <b>Dobutamine</b>                            | 0          | 3               | 4                 |
| <b>Sildenafil</b>                            | 0          | 3               | 2                 |
| <b>Statins</b>                               | 0          | 9               | 2                 |
| <b>Allopurinol</b>                           | 0          | 1               | 3                 |

Clinical parameters of the human interventricular tissue samples used in Western blot experiments. Data are expressed as mean and range. Abbreviations: CON: control; ICM: ischemic cardiomyopathy; DCM: dilated cardiomyopathy

**Supplementary Table S2 – Patient characteristics in radioimmunoassay and ELISA experiments**

| <b>Parameter</b>                             | <b>CON</b> | <b>ICM</b>      | <b>DCM</b>          |
|----------------------------------------------|------------|-----------------|---------------------|
| <b>Gender</b> (male/female)                  | 4/6        | 9/1             | 10/0                |
| <b>Age</b> (year)                            | 38 (17-52) | 62 (45-74)      | 48 (27-60)          |
| <b>BMI</b> (kg/m <sup>2</sup> )              | 26 (20-34) | 26 (20-33)      | 27 (20-39)          |
| <b>Ejection fraction</b> (%)                 | -          | 21 (10-33)      | 17 (5-25)           |
| <b>N-terminal pro-BNP</b> (pg/ml)            | -          | 3071 (338-7699) | 8632 (1001 - 35000) |
| <b>Medications:</b>                          |            |                 |                     |
| <b>Norepinephrine</b>                        | 10         | 0               | 1                   |
| <b>ACE inhibitors</b>                        | 0          | 8               | 8                   |
| <b>Beta receptor blockers</b>                | 1          | 10              | 10                  |
| <b>Mineralocorticoid receptor inhibitors</b> | 0          | 10              | 9                   |
| <b>Furosemide</b>                            | 2          | 0               | 0                   |
| <b>Mannitol</b>                              | 2          | 0               | 0                   |
| <b>Digoxin</b>                               | 0          | 2               | 2                   |
| <b>Mexiletine</b>                            | 0          | 1               | 1                   |
| <b>Amiodarone</b>                            | 0          | 2               | 6                   |
| <b>Anticoagulants</b>                        | 1          | 6               | 6                   |
| <b>Antiplatelets</b>                         | 0          | 7               | 0                   |
| <b>Dopamine</b>                              | 4          | 2               | 3                   |
| <b>Dobutamine</b>                            | 0          | 2               | 4                   |
| <b>Sildenafil</b>                            | 0          | 3               | 2                   |
| <b>Statins</b>                               | 0          | 10              | 1                   |
| <b>Allopurinol</b>                           | 0          | 4               | 3                   |

Clinical parameters of the human interventricular tissue samples used in radioimmunoassay and ELISA experiments. Data are expressed as mean and range. Abbreviations: CON: control; ICM: ischemic cardiomyopathy; DCM: dilated cardiomyopathy

## SUPPLEMENTARY FIGURES

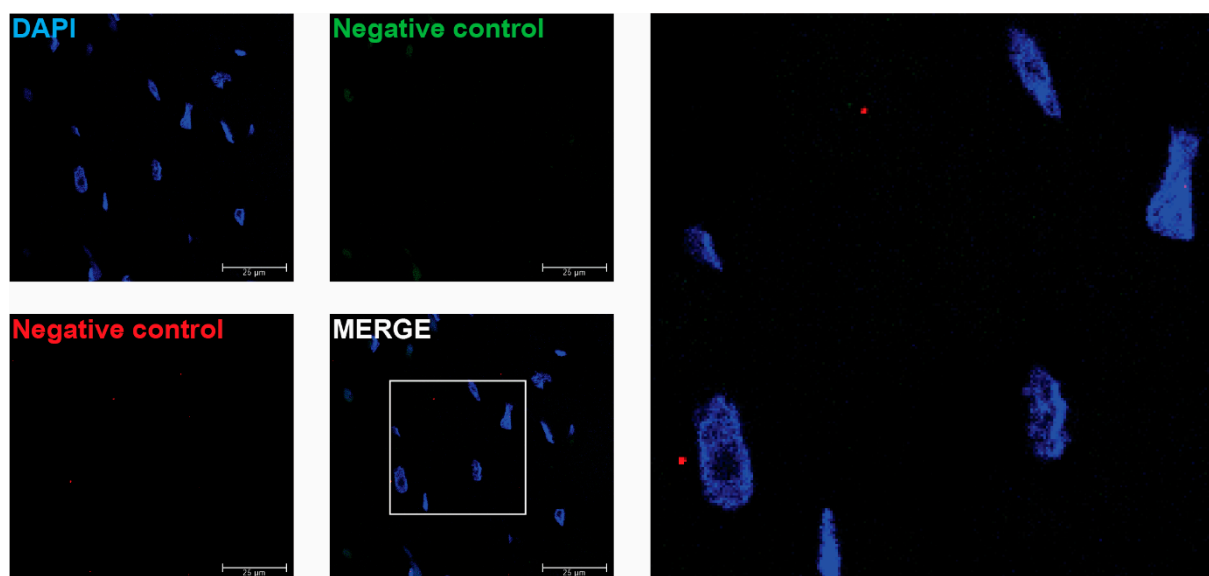

**Supplementary Figure S1** - Representative confocal microscopy images of RNA Scope® negative control (green, red) in histological samples of human control left ventricle. Cells were counterstained with DAPI (blue). Scale bar: 25 µm.
